# **LSD and psilocybin flatten the brain's energy landscape: insights from receptor-informed network control theory**

**S. Parker Singleton<sup>A\*</sup>, Andrea I. Luppi<sup>B,C</sup>, Robin L. Carhart-Harris<sup>D,E</sup>, Josephine Cruzat<sup>F,G</sup>, Leor Roseman<sup>D</sup>, David J. Nutt<sup>D</sup>, Gustavo Deco<sup>G,H,I,J</sup>, Morten L. Kringelbach<sup>K,L,M</sup>, Emmanuel A. Stamatakis<sup>B</sup>, Amy Kuceyeski<sup>A,N</sup>**

**<sup>A</sup> Department of Computational Biology, Cornell University, Ithaca, USA**

**<sup>B</sup> Division of Anesthesia, School of Clinical Medicine, University of Cambridge, Cambridge, United Kingdom**

**<sup>C</sup> Department of Clinical Neurosciences, University of Cambridge, Cambridge, United Kingdom**

**<sup>D</sup> Center for Psychedelic Research, Department of Brain Science, Imperial College London, London, United Kingdom**

**<sup>E</sup> Psychedelics Division, Neuroscape, University of California San Francisco, USA**

**<sup>F</sup> Latin American Brain Health Institute (BrainLat), Universidad Adolfo Ibanez, Santiago, Chile**

**<sup>G</sup> Center for Brain and Cognition, Computational Neuroscience Group, Department of Information and Communication Technologies, Universitat Pompeu Fabra, Roc Boronat 138, Barcelona, Spain**

**<sup>H</sup> Institució Catalana de la Recerca i Estudis Avançats (ICREA), Passeig Lluís Companys 23, Barcelona, Spain**

**<sup>I</sup> Department of Neuropsychology, Max Planck Institute for Human Cognitive and Brain Sciences, Leipzig, Germany**

**<sup>J</sup> School of Psychological Sciences, Monash University, Melbourne, Clayton, Australia**

**<sup>K</sup> Department of Psychiatry, University of Oxford, Oxford, United Kingdom**

**<sup>L</sup> Center of Music in the Brain (MIB), Clinical Medicine, Aarhus University, Denmark**

**<sup>M</sup> Centre for Eudaimonia and Human Flourishing, University of Oxford**

**<sup>N</sup> Department of Radiology, Weill Cornell Medicine, New York, USA**

**\*Corresponding author**

**Email address: [sps253@cornell.edu](mailto:sps253@cornell.edu) (S. Parker Singleton)**

## **Abstract:**

Psychedelics like lysergic acid diethylamide (LSD) and psilocybin offer a powerful window into the function of the human brain and mind, by temporarily altering subjective experience through their neurochemical effects. A recent model postulates that serotonin 2a (5-HT2a) receptor agonism allows the brain to explore its dynamic landscape more readily, as reflected by more diverse (entropic) brain activity. We postulate that this increase in entropy may arise in part from a flattening of the brain's control energy landscape, which can be observed using network control theory to quantify the energy required to transition between recurrent brain states measured using functional magnetic resonance imaging (fMRI) in individuals under LSD, psilocybin, and placebo conditions. . We show that LSD and psilocybin reduce the amount of control energy required for brain state transitions, and, furthermore, that, across individuals, LSD's reduction in control energy correlates with more frequent state transitions and increased entropy of brain state dynamics. Through network control analysis that incorporates the spatial distribution of 5-HT2a receptors from publicly available (non-drug) positron emission tomography (PET) maps, we demonstrate the specific role of this receptor in reducing control energy. Our findings provide evidence that 5-HT2a receptor agonist compounds allow for more facile state transitions and more temporally diverse brain activity. More broadly, by combining receptor-informed network control theory with pharmacological modulation, our work highlights the potential of this approach in studying the impacts of targeted neuropharmacological manipulation on brain activity dynamics.

## **Significance Statement:**

We present a multi-modal framework for quantifying the effects of two psychedelic drugs (LSD and psilocybin) on brain dynamics by combining functional magnetic resonance imaging (fMRI), diffusion MRI (dMRI), positron emission tomography (PET) and network control theory. Our findings provide evidence that psychedelics flatten the brain's control energy landscape, allowing for more facile state transitions and more temporally diverse brain activity. We also demonstrate that the spatial distribution of serotonin 2a receptors - the main target of LSD and psilocybin - is optimized for generating these effects. This approach could be used to understand how drugs act on different receptors in the brain to influence brain activity dynamics.

## **Introduction:**

Serotonergic psychedelics like lysergic acid diethylamide (LSD) and psilocybin induce a profound but temporary alteration of perception and subjective experience<sup>1</sup>. Combined with non-invasive neuroimaging such as functional MRI, these drugs offer a unique window into the function of the human mind and brain, making it possible to relate mental phenomena to their neural underpinnings.

A decade of neuroimaging studies has informed novel insights regarding psychedelic action in the brain<sup>2</sup>. One model, known as RElaxed Beliefs Under Psychedelics (REBUS)<sup>3</sup>, integrates previous accounts of psychedelic action (the Entropic Brain Hypothesis)<sup>4,5</sup> with the view of the brain as a prediction engine, whereby perception and belief are shaped by both prior knowledge and incoming information. The REBUS model postulates that psychedelics alter conscious experience via their agonist action at serotonin 2a (5-HT<sub>2a</sub>) receptors, which have especially high expression in higher-order cortical regions. Agonist-induced dysregulation of spontaneous activity in these regions is postulated to translate into decreased precision-weighting on prior beliefs - which has reciprocal (enabling) implications for bottom-up information flow. It is theorized that the observed increase in entropy of brain activity under psychedelics is reflective of reduced energetic demands or barriers for the brain to navigate its dynamic landscape. However, this hypothesis remains thus far untested.

Understanding and being able to objectively measure the mechanism(s) of psychedelics is paramount if we aim for their therapeutic use in psychiatric or neurologic disorders. Imaging the brains of healthy individuals under the effects of psychedelics offers data from which we can begin to build and test computational, neurobiologically informed models of psychedelic action. Recent work using such approaches has shown that the effects of serotonergic psychedelics on the dynamics of human brain activity are critically dependent on their action at 5HT<sub>2a</sub> receptors. Whole-brain neural-mass models have implicated the 5-HT<sub>2a</sub> receptor distribution across the cortex in shaping brain dynamics under the effects of LSD and psilocybin<sup>7,8</sup>, as well as demonstrating a role for 5-HT<sub>2a</sub> receptor agonism in increasing the temporal diversity (entropy) of brain activity in a way that is consistent with empirical observations<sup>9</sup>.

An alternative computational approach to modeling brain dynamics is network control theory, which focuses on quantifying and controlling how a dynamical system moves through its state space. It is well-known that even at rest the brain is not static, but rather it dynamically alternates between a number of recurrent states<sup>10-17</sup>. Such recurrent brain states may be relevant for cognition<sup>18-21</sup> and even consciousness<sup>22-28</sup>, and have been shown to undergo prominent reorganization during the psychedelic state induced by LSD<sup>6,7</sup> and psilocybin<sup>8,29</sup>. Crucially, network control theory approaches enable mapping of the brain's energy landscape by quantifying the energy required to transition between these recurrent states (Figure 1a/b). This type of energy can be referred to as 'control' or 'transition' energy. Recent work utilized these tools to demonstrate that although the resting human brain has a spontaneous tendency to prefer certain brain state transitions over others, cognitive demands can overcome this tendency in a way that is associated with age and cognitive performance. This work demonstrates that network control theory approaches can reveal neurobiologically and cognitively relevant brain activity dynamics<sup>30-32</sup>.

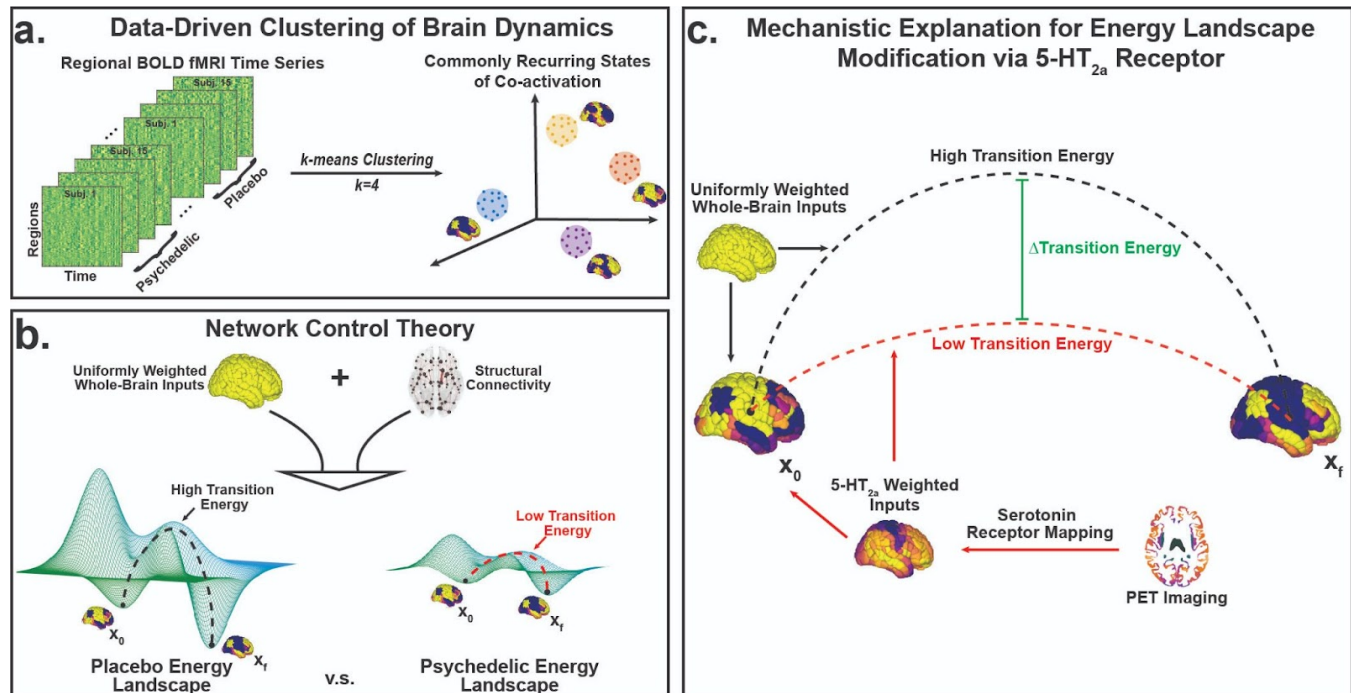

**Figure 1. Mapping the energy landscape of the human brain with network control theory. (a)** We concatenated all fMRI time series together (all subjects, all conditions) and employed the  $k$ -means clustering algorithm to identify common activation patterns, or states. **(b)** Using network control theory and a representative structural connectome<sup>33</sup>, we calculated the minimum energy required to transition between states (or maintain the same state) using each individual's brain states derived from the psychedelic and placebo conditions separately. Our calculations reveal an energy landscape that is flattened by LSD and psilocybin. **(c)** Weighting the energy calculations of the placebo brain states with inputs from PET-derived receptor density maps of the serotonin 2a receptor<sup>34</sup> also resulted in a flattened energy landscape, providing a mechanistic explanation for these drug's flattening effects.

Here, we leverage recent advances in network control theory to probe the relationship between energetic demands and entropy in the psychedelic state: we combine functional MRI data from two experiments comparing drug (LSD or psilocybin) to placebo, with separately obtained (under non-drug conditions) structural (white matter) connectivity from diffusion MRI (dMRI)<sup>33</sup> and receptor density maps from positron emission tomography (PET)<sup>34</sup>. We hypothesized that the energy required to transition between brain states would decrease under LSD and psilocybin compared to placebo and, furthermore, that the amount of control energy reduction would correlate with increases in entropy on an individual level. Finally, we tested the mechanistic hypothesis that serotonergic action at 5-HT<sub>2a</sub> receptors is responsible for this reduction in transition energy by demonstrating that the specific spatial pattern of 5-HT<sub>2a</sub> receptor expression flattens the energy landscape more than any other receptor distribution tested (Figure 1c).

## Results:

We analyzed 30 minutes of resting-state data acquired from 15 subjects over two sessions, either under the influence of LSD or a placebo<sup>35</sup>. To test the generalizability of our findings across datasets and with a different psychedelic compound, we replicated the analysis using 10 minutes of resting-state data acquired from 9 volunteers over two sessions, either under the influence of psilocybin or a placebo<sup>36</sup>. Importantly, the LSD scans were acquired approximately 2 hours following drug/placebo infusion in order to measure the “peak effects” of the drug, whereas the psilocybin participants were scanned immediately after infusion.

### **Data-driven clustering of brain activity patterns reveals recurrent states of opposing network activation**

Our first step was to identify recurrent states of brain activity. One commonly used approach to identifying recurrent brain states is through the k-means clustering algorithm<sup>7,8,30,37</sup>, whereby brain activation patterns from each individuals' scans are grouped into a pre-specified number of clusters  $k$ . Here, data-driven clustering of regional activity patterns identified  $k=4$  stable clusters that achieved optimal division of the data (see *Materials and Methods: Extraction of brain states* for choice of  $k$ ). The four clusters can be divided into two meta-states (Meta-State 1 and Meta-State 2, Figure 2), each composed of two sub-states that represent opposing activation patterns (MS-1a/b and MS-2a/b, Figure 2). Dichotomy of the brain's dynamic states has previously been observed<sup>30,38</sup> and is consistent with hierarchical organization<sup>39,40</sup>.

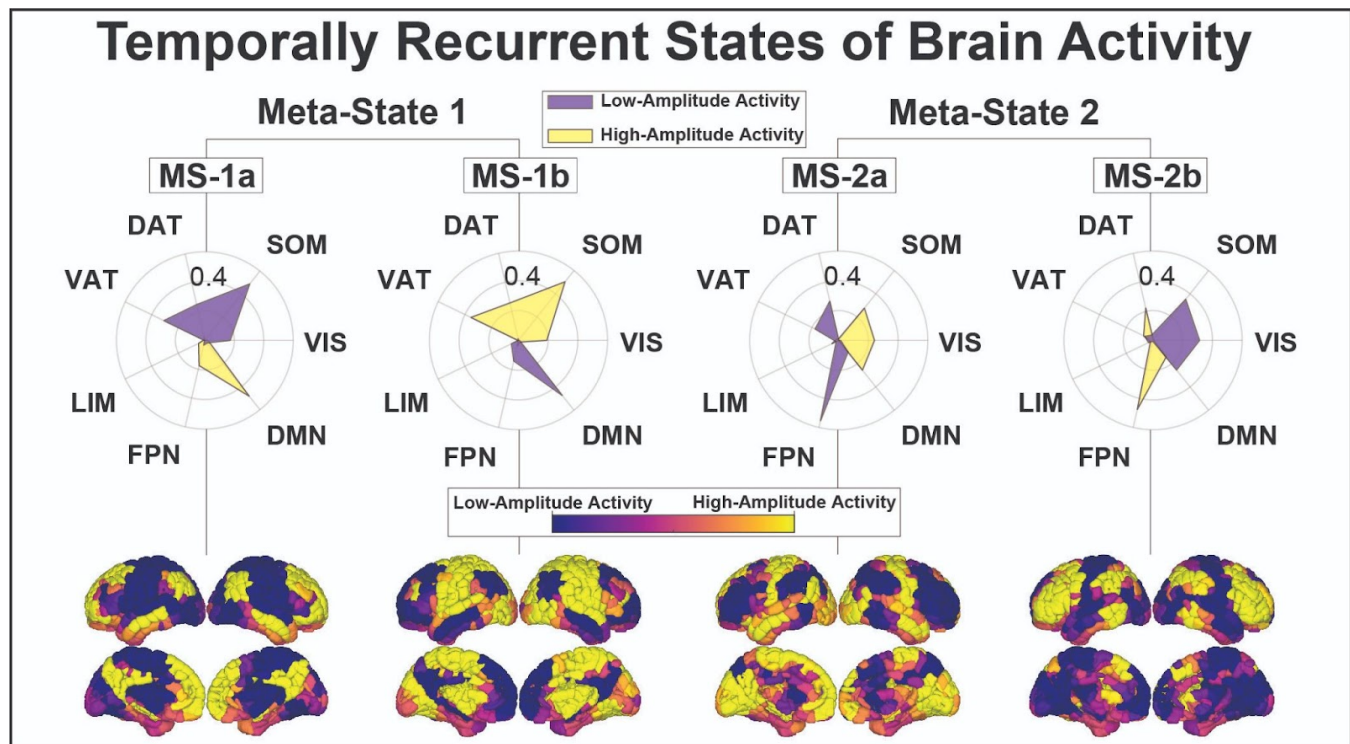

**Figure 2. Recurrent states of brain activity.** Group average recurrent brain states are represented by the mean activation pattern across all subjects and conditions for each of the 4 clusters (brain representations at the bottom of the figure). For each brain state, we separately calculated the cosine similarity (radial plots) of its high-amplitude (supra-mean) activity and low-amplitude (sub-mean) activity to a priori resting-state networks<sup>41</sup>

(RSNs); resulting similarity measures are represented via radial plots<sup>30</sup>. Meta-State 1 (MS-1) is composed of two sub-states (MS-1a and MS-1b) which are characterized by the contraposition of the somatomotor and ventral attention/salience networks with the default-mode network, whereas the Meta-State 2 (MS-2; MS-2a and MS-2b) is characterized by the contraposition of the default-mode, somatomotor and visual networks with the frontoparietal network. The dichotomy of these states can be observed visually in the radial plots and on the rendered brain volumes, and is confirmed via their negative, significant Pearson correlation (SI Figure 3, ii). States shown here are from the LSD dataset. States derived from the psilocybin dataset are highly similar (SI Figure 4). DAT dorsal attention network, DMN default mode network, FPN frontoparietal network, LIM limbic network, SOM somatomotor network, VAT ventral attention network, and VIS visual network.

### ***Psychedelics modulate brain dynamics by increasing occupancy in MS-1 and decreasing occupancy in MS-2***

To identify the effects of LSD on brain state dynamics, each subject's fMRI data were characterized in terms of the four identified brain states. From each subject's temporal sequence of brain states (Figure 3a) we obtained a systematic characterization of the temporal dynamics of the 4 states, namely, their fractional occupancies, or the probability of occurrence of each state (Figure 3b/c, i), dwell times, or the mean duration that a given state was maintained, in seconds (Figure 3b/c, ii), appearance rates, or how often each state appeared per minute (Figure 3b/c, iii), and transition probabilities, or the probability of switching from each state to every other state (Figure 4a/b, i).

We found that for both psychedelic and placebo conditions, the brain most frequently occupies MS-1 (higher fractional occupancy) whose constituent sub-states are also visited for the longest periods of time (highest dwell times) (Figure 3b). LSD modifies the fractional occupancy of these states by decreasing the dwell times of MS-2 and further increasing dwell times of the already dominant MS-1 (Figure 3b). No differences in appearance rate for the 4 sub-states were found when comparing the LSD and placebo conditions. In psilocybin, we found that fractional occupancy shifted in the same direction as LSD, however these changes were not significant. Interestingly, there were no significant changes in the dwell times under psilocybin, but there were significant increases in the appearance rates of two of the states (Figure 3c). Possibly, this highlights a subtle difference in the two compounds' impact on brain dynamics or a difference in dynamics under drug onset versus peak effects.

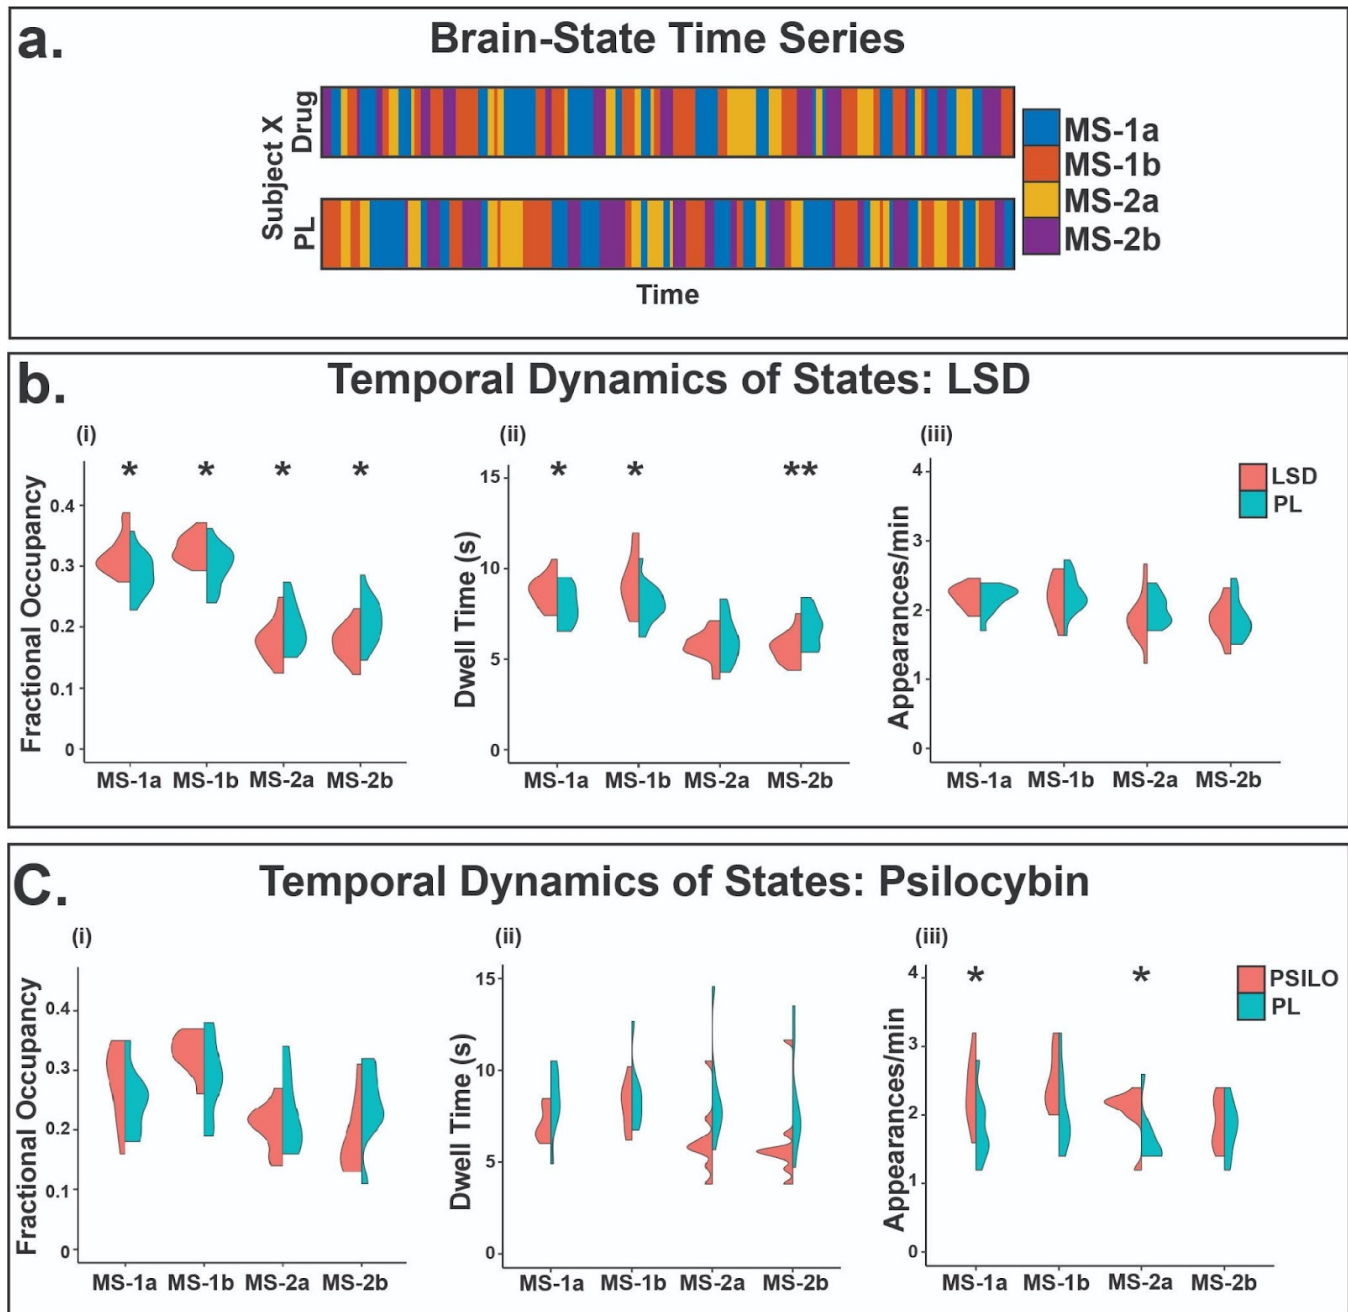

**Figure 3: Temporal brain dynamics shift under psychedelics.** (a) *k*-means clustering of the BOLD time series resulted in a brain state time series for each of the individuals' two scans<sup>30</sup>. We then calculated each brain states' (i) fractional occupancy, (ii) average dwell time, and (iii) average number of appearances per minute for each individual and condition in the (b) LSD and (c) psilocybin datasets. \*significant before multiple comparisons correction, \*\* significant after multiple comparisons correction.

Empirical transition probabilities were calculated independently for each individual and each condition (Figure 4a/b, i). We note changes during LSD and psilocybin that are consistent with the results observed in Figure 3. In the LSD data we observe significant increases in the probability of persistence for MS-1 and corresponding decreases in MS-2 (Figure 4a, i, diagonal). Under psilocybin we observe



decreased persistence of MS-2 but not a corresponding increased persistence of MS-1 (Figure 4b, i, diagonal). Possibly this indicates a difference in the compounds or timeline of administration. In both cases, we see an increased probability of transitioning from states in MS-2 to MS-1 states (Figure 4a/b, i, off-diagonal).

### ***Network control theory reveals psychedelic-induced flattening of the brain's control energy landscape.***

We next sought to provide a direct test of our hypothesis about decreased control energy requirements to transition between different states under psychedelics. To this end, we turned to network control theory<sup>30,31,42–44</sup>, which offers a framework to quantify the ease of state transitions in a dynamical system. Specifically, we calculated the transition energy (TE), which is the minimum amount of energy that would need to be injected into a network (here, the structural connectome<sup>33</sup>) to induce transitions between the possible states of its functional dynamics. Note that the transition energy from a given state to itself is the energy required to remain in that state, sometimes referred to as “persistence energy”. For each subject and condition, we calculated the energy needed to transition between each pair of brain states. On an individual level, brain states were defined as the centroid of all TRs assigned to each state during that individual's psychedelic or placebo scans. Comparing the two conditions, we found that both LSD and psilocybin lowered the TE (Figure 4a/b, ii) between all possible combinations of initial and final brain states.

Importantly, network control theory requires a specification of a set of “control points” where energy is injected into the system to induce the desired transition. For the previous analysis, we chose uniform inputs over all brain regions. However, one can also ask whether this effect may be driven by a specific set of regions<sup>30</sup>. This is relevant because the changes in brain function under investigation in the present study arise from either the administration of LSD or psilocybin. The serotonin 2a (5-HT2a) receptor is well established as the site responsible for the key characteristic subjective<sup>45–48</sup> and neural<sup>7–9,49</sup> effects of LSD, psilocybin, and other classic serotonergic psychedelics, and this receptor is not uniformly distributed across the brain<sup>34</sup>. Therefore, we sought to determine if the specific regional distribution of 5HT2a receptors in the brain could correspond to especially suitable control points for inducing a reduction in transition energy.

To test this hypothesis, we utilized a high resolution *in vivo* atlas of the serotonin receptor 5HT2a derived from PET imaging to extract biologically relevant weights for our model<sup>34</sup>. First, we recalculated the energy matrices for each placebo condition, this time weighting the energy injected into every region in proportion to its amount of 5-HT2a expression. In every possible transition, we observed that the 5-HT2a-weighted inputs provided lower TE than the uniform inputs (Figure 4a/b, iii).

However, it could be argued that giving additional control to some regions will result in a lower control energy, regardless of their particular spatial arrangement. To demonstrate that our results are specific to 5-HT2a receptors' spatial distribution across brain regions, we compared the TEs obtained from the true 5-HT2a distribution, versus 10,000 spin permutations that preserve the set of weights and their spatial autocorrelations but not the regions they correspond to<sup>50,51</sup>. The true distribution of 5-HT2a still resulted in significantly lower energies (Figure 4a/b, iv), demonstrating the critical role of the specific

regional distribution of 5HT2a receptors for inducing low-energy state transitions such as those empirically observed under the effects of LSD and psilocybin.

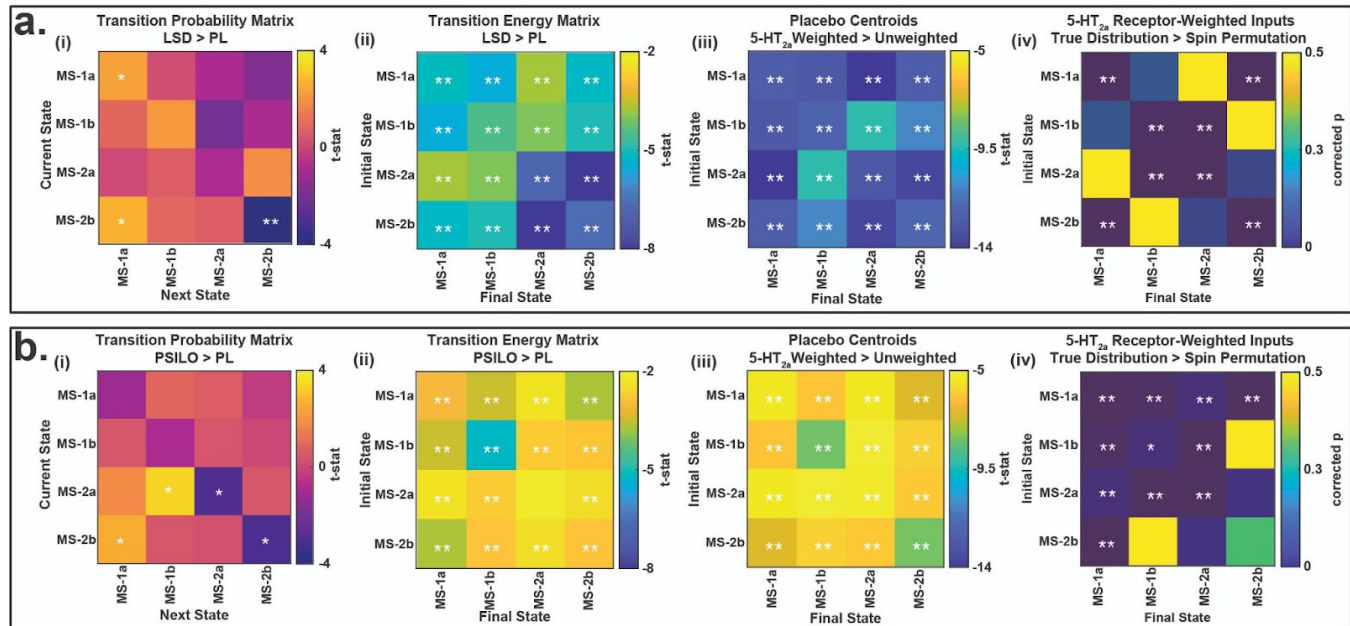

**Figure 4: The control energy needed to transition between brain states is reduced by LSD, psilocybin and the spatial distribution of 5-HT<sub>2a</sub> receptor maps. (a)** LSD comparisons (n = 15) **(b)** Psilocybin comparisons (n = 9) **(a/b, i)** Comparison of the empirically observed transition probabilities between states, derived from the brain state time series, e.g. Figure 3a. **(a/b, ii)** Comparison of the transition energies calculated from placebo brain states versus those calculated from LSD or psilocybin brain states using uniformly-weighted whole-brain inputs. LSD and psilocybin brain states both had significantly lower energy required for every transition. **(a/b, iii)** Weighting the control vector by the 5-HT<sub>2a</sub> receptor density map<sup>34</sup> results in significantly lower energies for the placebo centroids (brain states) compared to uniformly-weighted control vector inputs. **(a/b, iv)** To probe the spatial specificity of part (iii), we repeated the calculations using 10,000 spin-permuted receptor maps<sup>50</sup>. We found that the control vector constructed using the true 5-HT<sub>2a</sub> receptor map resulted in significantly lower energy required for nearly every transition compared to the control vector constructed using the shuffled receptor maps. (See SI for choice of the time-span *T* over which the transition energy was computed). \*significant before multiple comparisons correction, \*\* significant after multiple comparisons correction.

In a final demonstration of the specific importance of the 5-HT<sub>2a</sub> receptor, we investigated the shift in TEs provided by three additional serotonin receptors (5-HT<sub>1a</sub>, 5-HT<sub>1b</sub>, 5-HT<sub>4</sub>) and the serotonin transporter, 5-HTT, all obtained from the same high-resolution PET atlas<sup>34</sup>. We compared the overall mean of the energy matrix for each individual's 2a-weighted calculations versus all others and found that 5-HT<sub>2a</sub> was the most effective at lowering the overall energy to transition between empirically defined brain states (Figure 5). This is especially noteworthy because serotonin 2a receptor agonism plays a prominent role in how LSD, psilocybin, and other classic psychedelics influence neural activity and subjective experience<sup>7-9,45-49</sup>. Together, these results demonstrate that the 5-HT<sub>2a</sub> receptor is neurobiologically and spatially well-suited for control energy landscape flattening.

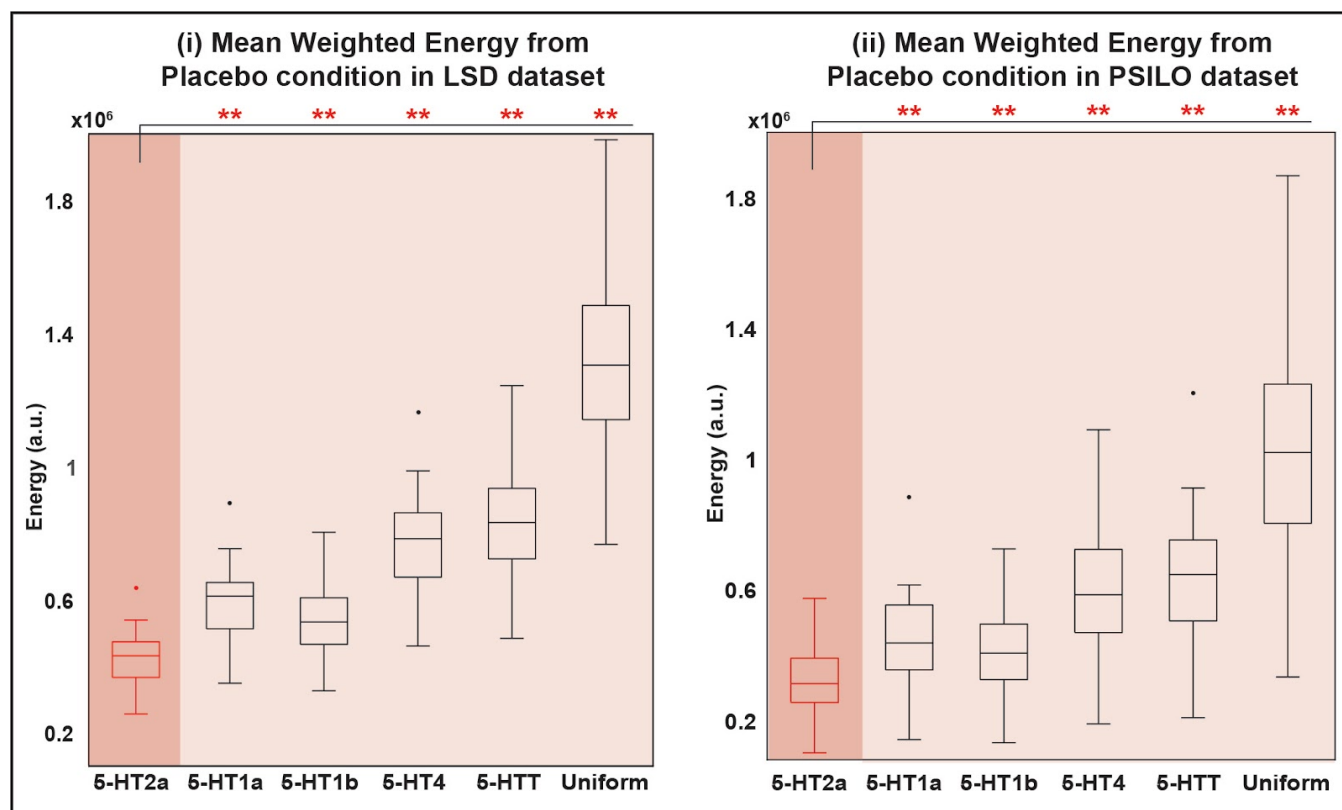

**Figure 5: The serotonin 2a receptor flattens the control energy landscape more than any other receptor tested.** We weighted our model with expression maps of other serotonin receptors (5-HT1a, 5-HT1b, and 5-HT4), and the serotonin transporter (5-HTT), and found that 5-HT2a resulted in significantly lower transition energy (averaged across all pairs of states) than all others. **(i)** Energies calculated from each subject's placebo centroids in the LSD dataset ( $n = 15$ ). **(ii)** Energies calculated from each subject's placebo centroids in the psilocybin dataset ( $n = 9$ ). • outlier, \*\* significant after multiple comparisons correction.

Notably, the 5-HT1b receptor resulted in the second largest energy reduction in our model. This is of particular interest as recent animal models have implicated this receptor as the the potential site of antidepressant action of selective serotonin reuptake inhibitors (SSRIs)<sup>52</sup> and may be a route through which serotonergic psychedelics like psilocybin enact their synaptogenesis and potential antidepressant effects<sup>53,54</sup>.

### ***Increased flattening of the control energy landscape is associated with more entropic brain dynamics***

Crucially, the results demonstrating the specific role of 5HT2a receptors in flattening the control energy landscape were based exclusively on calculations using placebo data. Therefore, we next sought to test how the average TE reduction (Figure 4a/b, ii) may affect empirical transition energies and corresponding brain dynamics. Specifically, we show that, across the 15 individuals, the relative change in control energy induced by LSD was significantly correlated with the empirically observed changes in state dwell times (Figure 6, i) and appearance rates (Figure 6, ii),  $p < 0.05$ , uncorrected.

Our results show that the more LSD lowered the average transition energy of a given subject, the more the empirically observed dwell times decreased and the more the empirically observed appearance

rates increased. This is particularly interesting, as there were no group-level differences in appearance rates between the two conditions, and a mix of increased and decreased dwell times depending on the state. While the correlations identified are consistent with our hypothesis of a flattened control energy landscape wherein lower barriers between brain states result in increased frequency of state transitions and shorter state dwell times, it seems this individual-level effect does not translate to a group difference in dwell time or appearance rate (SI Figure 5a). Interestingly, the psilocybin data had the same directionality of correlation between control energy reductions and decreased dwell time ( $r = 0.444$ ,  $p = 0.271$ ;  $n = 9$ ) and increased appearance rate ( $r = -0.453$ ,  $p = 0.259$ ,  $n = 9$ ) (SI Figure 4c). However, these data had the additional characteristic of group-level reductions in dwell time and increases in appearance rate under psilocybin compared to placebo that are more straightforward to interpret under the REBUS hypothesis (SI Figure 5b). Future work with a larger number of subjects may allow further interrogation of this phenomena.

Ratings of the drug's subjective effects were also obtained from each individual (see SI for details) and we hypothesized that transition energy reduction by LSD or psilocybin would also predict a more intense subjective experience. We did not find any significant correlations between energy flattening and subjective ratings; extending the present modeling framework to subjective measures may be a fruitful avenue for future research.

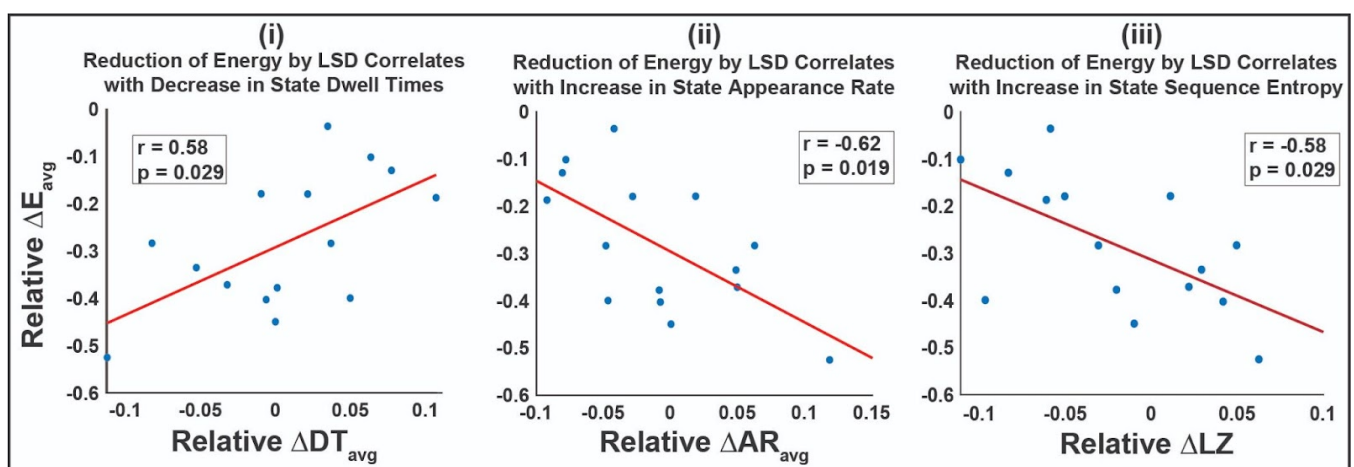

**Figure 6: Larger reduction of average transition energy by LSD correlates with more dynamic brain activity across individuals.** Significant Pearson correlations exist between an individual's amount of energy reduction by LSD and the relative change in state (i) dwell times, (ii) appearance rates, and (iii) entropy of the brain state time series. Relative difference was calculated as (LSD - PL)/(LSD + PL). Partial correlations were calculated while controlling for an individual's head motion (mean framewise displacement). ( $n = 15$ , uncorrected p-values). Psilocybin exhibited the same directionality of correlation in each case, however none were significant (SI Figure 4c).

Lastly, we asked whether control energy reduction induced by LSD or psilocybin would correlate with more complex (entropic) brain state time series. This analysis aimed to test the theoretical link between a flatter control energy landscape and more entropic brain activity. One could imagine a scenario where shorter dwell times and larger appearance rates result in a sequence that is highly predictable (e.g. [1 2 1 2 1 2]). We wanted to test the hypothesis that the true scenario would be the opposite - namely, that a

flatter control energy landscape would in fact correspond to an increase in the diversity of brain dynamics. Numerous studies have linked changes in the entropy of neuroimaging signals to the psychedelic state<sup>5,55–59</sup> and the ability for these compounds to increase neural entropy via 5-HT<sub>2a</sub> agonism is thought to be a key process in the breakdown of the functional hierarchy of the brain and a central component of REBUS<sup>3,4,60</sup>. To test this hypothesis, we used Lempel-Ziv compressibility to compute the entropy rate of the temporal sequence of brain meta-states (MS-1 and MS-2). Supporting our hypothesis, we found that the more a subject's energy landscape was flattened by LSD, the more entropic their brain state time series became (Figure 6, iii). Once again, this correlation was not significant in the psilocybin data (SI Figure 4c); however, we note that the complexity measure deployed here needs particularly large effect sizes to detect differences in such short scans, with few TRs. This result directly and quantitatively links a flatter control energy landscape with more entropic brain activity.

### **Replication studies**

We provide replication of the main findings using data from the LSD study in several ways: a) analyzing another fMRI scan in which subjects were listening to music (SI Figure 7), b) using a different brain atlas (SI Figure 8c, ii), c) preprocessing the fMRI data with global signal regression (GSR) (SI Figures 10c, ii), d) using a different clustering algorithm (SI Figure 12b), e) using a wide range of number of clusters  $k$  (SI Figure 14), f) when clustering each condition (LSD and placebo) separately (SI Figure 15, ii), g) and when clustering individuals separately (SI Figure 15, iv). All results support the main findings.

### **Discussion:**

Here, we combined fMRI data with separately obtained PET and diffusion MRI data under the framework of network control theory to test our hypothesis that serotonergic psychedelics like LSD and psilocybin induce more entropic brain activity in a manner related to a “flattening” of the control energy landscape in the human brain. A flatter energy landscape corresponds to lower barriers to transition between different states of brain activity. This is theorized to correspond to a flattening of the functional hierarchy as well<sup>60</sup>, i.e. a relaxation of the weighting of high-level priors - thought to be a pivotal component of psychedelics' therapeutic mechanism<sup>3</sup>. Our results demonstrate: (a) a flattening of the brain's energy landscape, indicated by lower control energy being required to transition between brain states under both LSD and psilocybin, and (b) a correlation between flattening of the energy landscape (reduced energy required for state transitions) and more diverse (entropic) sequences of brain activity under LSD. Combining fMRI with publicly available diffusion MRI and PET information, we were further able to provide computational evidence that (c) the serotonin 2a receptor is especially well-positioned to bring about this flattening of the energy landscape, over and above other 5-HT receptors.

Compared with placebo, subjects in the psychedelic condition spent a larger fraction of time occupying states characterized by the contraposition of the DMN with bottom-up sensorimotor and salience networks (MS-1), and less time in states dominated by the contraposition between DMN and top-down fronto-parietal control network (MS-2) (Figure 3b). Since our analysis was carried out on resting-state data, it is not surprising that the DMN was prominent across all four brain states<sup>61–64</sup>. It should be noted that this regional-level, activation-based study is not expected to capture the previously reported DMN disintegration<sup>35</sup> (a functional connectivity measure), nor the reduced voxel-level blood flow or BOLD

signal indexed ‘activity’ level of some DMN nodes<sup>36</sup> under psychedelics. Additionally, our quantification of the brain’s energy landscape through network control theory revealed that LSD and psilocybin lower the transition energy between all states (Figure 4a, ii). These results are supported by replications using several variations of data, processing and analysis choices.

Given the well-known involvement of 5-HT<sub>2a</sub> receptors with the neurobiological and subjective effects of classic psychedelics, we next sought to determine if the spatial distribution of 5-HT<sub>2a</sub> receptors across the human cortex could provide a mechanistic explanation for our results. Weighting the model in proportion to the empirical regional density of 5-HT<sub>2a</sub> receptors obtained from *in vivo* PET imaging<sup>34</sup>, we found that the resulting transition energies were greatly reduced, mirroring those of the psychedelic condition (Figure 4a/b, iii). Further, to demonstrate the importance of this receptor’s spatial distribution, we tested the true 5-HT<sub>2a</sub> receptor distribution against a spatial autocorrelation preserving null model (i.e. spin test)<sup>50</sup> and found that the original map consistently resulted in lower energies than the shuffled maps (Figure 4a/b, iv). The calculations were also repeated with other subsets of the 5-HT receptor class, and 5-HT<sub>2a</sub> receptor was the most effective at reducing energy (Figure 5), consistent with the known specificity of LSD and psilocybin for this receptor.

The Entropic Brain Hypothesis (EBH)<sup>4,5</sup> proposes that increased neural entropy brought forth by psychedelics is reflected in subjective experience as an increase in the richness or depth of conscious content<sup>65</sup>. We found that at an individual subject level, increased LSD-induced transition energy reductions correlated with more dynamic brain activity (Figure 6, i,ii), thereby relating the theoretical interpretation of transition energy with its role in the empirical de-stabilization of brain state dynamics. We also found that the entropy rate of an individual's sequence of meta-states increased in proportion to the LSD-induced energy reduction (Figure 6, iii), thereby relating the energy landscape of the brain to its entropy.

More broadly, these results demonstrate that the combination of network control theory and specific information about neurobiology (here exemplified by receptor distributions from PET) can offer powerful insights about brain function and how pharmacology may modulate it - opening the avenue for analogous studies on the effects of pharmacological interventions in clinical populations (e.g. depression, schizophrenia)<sup>31,32</sup>. While other recent computational approaches have successfully modeled the effects of serotonergic compounds on dynamic brain states<sup>7,8</sup> and the entropy of spontaneous neural activity<sup>9</sup>, the present approach is the first to do both while also quantitatively evaluating the energy landscape of the psychedelic state.

### **Limitations and Future Work:**

Although small sample size is common in neuroimaging studies of psychedelics and other states of altered consciousness due to the inherent difficulties of collecting such data, future replications with larger samples would be appropriate. We also acknowledge that these datasets have been studied extensively before<sup>6–9,35,36,59,60,67–71</sup> and replications in different datasets will be warranted to ensure the generalizability of these results. Although the LSD dataset is more suitable for obtaining robust measurements of brain dynamics using the methods presented here, primarily because of the longer scans, and, in addition, the larger sample size, we still found that psilocybin modified the brain’s energy

landscape and dynamics in a similar fashion to LSD. Future experiments will be necessary to determine if the subtle differences in results found between LSD and psilocybin are a result of sample size, scan length, or pharmacodynamics (different receptor profiles, metabolism, or “peak” versus onset effects).

One other consideration is the objective quality of the clustering - because fMRI measures the smoothly varying hemodynamic response to neuronal activation (BOLD)<sup>72,73</sup>, there may be suboptimal separation of clusters. For example, even if neuronal activity does switch between states near-instantaneously, there will still be a smoothing of the measured activity in the fMRI which would result in some TRs occurring at the boundaries of the states. Despite this potential limitation, our current work and previous studies on dynamic states from fMRI have revealed physiologically and behaviorally meaningful cluster-based metrics<sup>6,8,18,29,30,74–76</sup>.

As used here, the term “energy” denotes the magnitude of the input that needs to be injected into the system (the brain’s structural connectome) in order to obtain the desired state transition. It should not be confused with metabolic energy of ATP molecules, nor with the energy quantified through connectome harmonic decomposition, which has also been investigated in the context of the LSD dataset<sup>67,70</sup> and other states of altered consciousness<sup>68</sup>. It is also not a direct measure of the brain’s variational free energy landscape<sup>66</sup>, an information theoretic topic foundational to REBUS. We hypothesize that the empirical changes in control energy demonstrated here indicate a flattening of the posterior, which may or may not arise from a relaxation of prior beliefs and a flattening of the free energy landscape as posited by REBUS. Future work will be required to determine if any direct relationship exists between free energy and control energy.

Additionally, we had hypothesized that the transition energy modifications by LSD would correlate with our participants’ subjective experience as captured by intra-scanner visual analog scale ratings, and the 11-factor states of consciousness (ASC) questionnaire<sup>77,78</sup> taken at the end of the day. There may be numerous factors that limit our ability to model these effects. Psychedelics have been found to impair some aspects of memory recollection in humans<sup>79</sup> (though not autobiographical memory recollection<sup>80</sup>), which may arguably impact on the fidelity of post-hoc subjective ratings and how they correlate with acute, objective brain measures. In addition, both subjective experience ratings and the relative energy landscape (baseline or drug) may be impacted by each individual’s prior psychedelic use, individual differences in pharmacological dose response, as well as their own unique structural connectome and 5-HT<sub>2a</sub> receptor distribution. Indeed, the structural connectome and the PET data used in our analysis were representative examples obtained from population averages (not under drug conditions), rather than unique data derived from each individual in our study. Although these measures are thought to be less variable across individuals than brain activity dynamics, future work could explore how individual differences in the structural connectome or receptor maps influence the energy landscape - and possibly subjective experiences.

Finally, our approach is based on network control theory, which differs from other recent computational investigations using e.g. whole-brain simulation through dynamic mean-field modeling of brain activity<sup>7–9,24</sup>. These latter approaches employ a neurobiologically realistic model of brain activity based on mean-field reduction of spiking neurons into excitatory and inhibitory populations, and have been used to account for non-linear effects of 5HT<sub>2a</sub> receptor neuromodulation induced by psychedelics. In

contrast, network control theory relies on a simpler linear model, which we employed due to its ability to address our prediction that transition (control) energies would be reduced under psychedelics. Additionally, recent evidence suggests that most of the fMRI signal may be treated as linear<sup>81,82</sup>. By using the same linear equation for modeling both the psychedelic and placebo states, we quantify relative changes in the energy landscape while keeping the dynamics of the model the same for each case; implicitly, this also means that we assume that the underlying structural connectivity is providing the same contribution in both conditions. However, using different models for the two cases may represent an avenue for future research. Combining both approaches to capitalize on the strengths of each will be a fruitful avenue for future work.

### **Conclusion:**

For the first time, we apply a framework for receptor-informed network control theory to understand how the serotonergic psychedelics LSD and psilocybin influence human brain function. Combining fMRI, diffusion MRI, PET and network control theory, we present evidence supporting the hypothesis that psychedelics flatten the brain's energy landscape and, furthermore, provide a mechanistic explanation for this observed energy reduction by demonstrating that the empirical spatial distribution of 5-HT<sub>2a</sub> receptor expression is particularly well-suited to flatten the brain activity landscape. This work highlights the potential of receptor-informed network control theory to allow insights into pharmacological modulation of brain function.

### **Materials and Methods:**

#### ***Data collection: LSD***

Data acquisition is described in detail previously<sup>35</sup>. In brief, twenty healthy volunteers underwent two MRI scanning sessions at least 14 days apart. A fully randomized, double-blind design is often considered the gold standard; however, experimental blinding is known to be ineffective in studies with conspicuous interventions. Thus, a single-blind, balanced-order design with an inert placebo (offering the simplest and “cleanest” possible control condition) was considered an effective compromise. On one day, participants were given placebo (10 mL saline), and on the other day they received LSD (75 µg in 10 mL saline), infused over two minutes, approximately 2 hours before resting-state scanning. Post-infusion, subjects had a brief acclimation period in a mock fMRI scanner. On each scanning day, three 7:20 minute eyes-closed resting-state scans were acquired. The first and third scan had no stimulation, while the second scan involved listening to music; this scan was not used in this analysis as we were interested in dynamics in the absence of external stimulation. BOLD fMRI was acquired at 3T with TR/TE = 2000/35ms, FoV = 220mm, 64 × 64 acquisition matrix, parallel acceleration factor = 2, 90 flip angle. Thirty-five oblique axial slices were acquired in an interleaved fashion, each 3.4mm thick with zero slice gap (3.4mm isotropic voxels). One subject was excluded due to anxiety, and 4 due to excessive head motion, leaving 15 subjects (four women; mean age, 30.5 ± 8.0) for analysis. Principally, motion was measured using framewise displacement (FD). The criterion for exclusion was subjects with >15% scrubbed volumes when the scrubbing threshold is FD = 0.5. After discarding these subjects we reduced the threshold to FD = 0.4. The between-condition difference in mean FD for the 4 subjects that were discarded was 0.323±0.254 and for the 15 subjects that were used in the analysis the difference in mean FD was 0.046 ±0.032 (p = 0.0002).



### **Data collection: Psilocybin**

Data acquisition is described in detail previously<sup>36</sup>. In brief, fifteen health volunteers underwent two MRI scanning sessions at least 14 days apart. In each session, subjects were injected with either psilocybin (2 mg dissolved in 10 mL of saline, 60-s i.v. injection) or a placebo (10 mL of saline, 60-s i.v. injection) in a counterbalanced design. The infusions began exactly 6 min after the start of the 12-min fMRI scans and lasted 60 s. The subjective effects of psilocybin were felt almost immediately after injection and sustained for the remainder of the scanning session. The 5 minutes of post-infusion data were used for the present analysis. BOLD-weighted fMRI data were acquired at 3T using a gradient echo EPI sequence, TR/TE 3000/35 ms, field-of-view = 192 mm, 64 × 64 acquisition matrix, parallel acceleration factor = 2, 90° flip angle. Fifty-three oblique axial slices were acquired in an interleaved fashion, each 3 mm thick with zero slice gap (3 × 3 × 3-mm voxels). Following the same exclusion criteria for motion described above, nine subjects were kept for analysis (seven men; age, 32 ± 8.9 SD y of age).

### **Data preprocessing**

Data pre-processing utilized AFNI, Freesurfer, FSL and in-house code<sup>35,36</sup>. Steps included 1) removal of first three volumes; 2) de-spiking; 3) slice time correction; 4) motion correction (Please see *SI: Motion* for additional steps taken to account for motion); 5) brain extraction; 6) rigid body registration to anatomical scans; 7) non-linear registration to 2mm MNI space; 8) scrubbing - using a frame-wise displacement threshold of 0.4. The maximum number of scrubbed volumes per scan was 7.1%; scrubbed volumes were replaced with the mean of the preceding and following volumes; 9) spatial smoothing; 10) band-pass filtering (0.01 to 0.08 Hz); 11) de-trending; 12) regression out of 6 motion-related and 3 anatomical-related nuisance regressors. Lastly, time series for 462 gray matter regions<sup>83</sup> were extracted (Lausanne scale 4, sans brain-stem). Regional time-series were de-meant prior to analysis.

### **Structural connectivity network construction**

Since diffusion MRI was not acquired as part of the LSD study, the structural connectome used for network control theory analysis was identical to the one used in prior work<sup>6</sup>. Namely, we relied on diffusion data from the Human Connectome Project (HCP, <http://www.humanconnectome.org/>), specifically from 1021 subjects in the 1200-subject release<sup>84</sup>. A population-average structural connectome was constructed and made publicly available by Yeh and colleagues in the following way<sup>33</sup>. Multishell diffusion MRI was acquired using b-values of 1000, 2000, 3000 s/mm<sup>2</sup>, each with 90 directions and 1.25 mm iso-voxel resolution. Following previous work<sup>6,85</sup>, we used the QSDR algorithm<sup>86</sup> implemented in DSI Studio (<http://dsi-studio.labsolver.org>) to coregister the diffusion data to MNI space, using previously adopted parameters<sup>85</sup>. Deterministic tractography with DSI Studio's modified FACT algorithm<sup>87</sup> then generated 1,000,000 streamlines, using the same parameters as in prior work<sup>6,43,85</sup>, specifically, angular cutoff of 55°, step size of 1.0 mm, minimum length of 10 mm, maximum length of 400mm, spin density function smoothing of 0.0, and a QA threshold determined by DWI signal in the CSF. Each of the streamlines generated was screened for its termination location using an automatically generated white matter mask, to eliminate streamlines with premature termination in the white matter. Entries in the structural connectome  $A_{ij}$  were constructed by counting the number of streamlines connecting every pair of regions  $i$  and  $j$  in the Lausanne-463<sup>83</sup> (sans brain-stem) and

augmented Schaefer-232 atlas<sup>88,89</sup> as done previously<sup>6,85</sup>. Lastly, streamline count was normalized by the number of voxels contained in each pair of regions.

### **5-HT receptor mapping**

Details for obtaining the serotonin receptor density distribution have been previously described<sup>34</sup> however we provide a brief summary here. PET data for 210 participants (not under the influence of psychedelics) were acquired on a Siemens HRRT scanner operating in 3D acquisition mode with an approximate in-plane resolution of 2mm (1.4 mm in the center of the field of view and 2.4 mm in cortex)<sup>90</sup>. Scan time and frame length were designed according to the radiotracer characteristics. For details on MRI acquisition parameters, which were used to coregister the data to a common atlas, see Knudsen et al<sup>91</sup>. For details on MRI and PET data processing, see the original reference<sup>34</sup>.

### **Extraction of brain states**

Following Cornblath et al.<sup>30</sup>, all subjects' fMRI time series for both conditions were concatenated in time and  $k$ -means clustering was applied to identify clusters of brain activation patterns, or states. Pearson correlation was used as the distance metric and clustering was repeated 50 times with different random initializations before choosing the solution with the best separation of the data. To further assess the stability of clustering and ensure our partitions were reliable, we independently repeated this process 10 times and compared the adjusted mutual information (AMI)<sup>92</sup> between each of the 10 resulting partitions. The partition which shared the greatest total AMI with all other partitions was selected for further analysis. In general, we found that the mutual information shared between partitions was quite high, suggesting consistent clustering across independent runs (*see SI: Assessing the stability of clustering*). We chose the number of clusters  $k$  via the elbow criterion, i.e. by plotting the variance explained by clustering for  $k=2$  through 14 and identifying the "elbow" of the plot, which was between 4-6 across the various partitions. In addition, increasing  $k$  beyond  $k=5$  resulted in a gain of less than 1% of variance explained by clustering, a threshold used previously for determining  $k$  (*see SI: Choosing  $k$* )<sup>30</sup>. We chose  $k=4$  for its straightforward and symmetric interpretation, however the energy landscape findings are replicated with  $k=2-14$  and all findings for  $k=5$  are provided in the Supplemental Information.

### **Characterization of brain states and their hierarchy**

Each cluster centroid was characterized by the cosine similarity between it and binary representations of seven a priori defined RSNs<sup>30,41</sup> as shown in the radial plots of Figure 2. Because the mean signal from each scan's regional time series was removed during bandpass filtering, positive values in the centroid reflect activation above the mean (high-amplitude) and negative values reflect activation below the mean (low-amplitude). To quantify the hierarchical relationship between centroids observed in the radial plots, we calculated the Pearson correlation values between all centroids (SI Figure 3) and grouped the anti-correlated pairs together, and refer to each individual centroid as a sub-state and the pair collectively as a meta-state<sup>30,38</sup>. For replications with other data or processing choices, the states were ordered and labeled based on their maximum correlation with the original 4 centroids in Figure 2.

We can extract 1) group-average centroids by taking the mean of all TR's assigned to each cluster (all subjects, all conditions) (shown in Figure 2), 2) condition-average centroids by taking the mean of all TR's assigned to each cluster separately for each condition (shown in SI Figure 6; placebo

condition-average centroids were used for Figure 4a/b, iv and Figure 5 calculations), and 3) individual condition-specific centroids by taking the mean of all TRs assigned to each cluster for a single subject and condition (used for Figure 4a, ii & iii calculations). When taking condition-average centroids (LSD and PL), we find that these two sets of centroids are highly correlated with one another (SI Figure 6d), and thus are also very similar to the group-average centroids shown here.

### **Temporal brain state dynamics**

We then analyzed the temporal dynamics of these brain states to observe how they change after administration of LSD and psilocybin<sup>30</sup>. The fractional occupancy of each state was determined by the number of TRs assigned to each cluster divided by the total number of TRs. Dwell time was calculated by averaging the length of time spent in a cluster once transitioning to it. Appearance rate was calculated as the total number of times a state was transitioned into per minute. Transition probability values were obtained by calculating the probability that any given state  $i$  was followed by state  $j$ .

### **Energy calculations**

Network control theory allows us to probe the constraints of white-matter connectivity on dynamic brain activity, and to calculate the minimum energy required for the brain to transition from one activation pattern to another<sup>30,42,93</sup>. Here, we utilized network control theory to understand the structural and energetic relationships between these states and the 5-HT<sub>2a</sub> receptor distribution. While this procedure has been detailed elsewhere<sup>30</sup>, we summarize briefly here and in the Supplemental Information. We obtained a representative NxN structural connectome  $A$  obtained as described above using deterministic tractography from HCP subjects (*see Methods and Materials; Structural Connectivity Network Construction*), where  $N$  is the number of regions in our atlas. We then employ a linear time-invariant model:

$$\dot{x}(t) = Ax(t) + Bu(t)$$

where  $x$  is a vector of length  $N$  containing the regional activity at time  $t$ .  $B$  is an NxN matrix that contains the control input weights.  $B$  is the identity matrix for uniform inputs and contains the regional receptor density information in the diagonal when incorporating the 5-HT receptor maps. For the latter case, the diagonal of  $B$  was set to 1 plus the normalized regional receptor density value, resulting in a diagonal matrix whose non-zero entries were between 1 and 2. This computational approach allows us to compute the transition energy as the minimum energy required to transition between all pairs of the substates.

The energy calculations in Figure 4a (ii) consisted of separate calculations for each individual's LSD and placebo centroids separately, (iii) utilized each individual's placebo centroids while varying the control input weights  $B$ , and (iv) used the group average placebo centroids, and  $B$  was varied for each random permutation. Figure 4b again used each individual's placebo centroids, while varying control input weights  $B$ .

### **Lempel-Ziv complexity**

In order to quantify the entropy of each subject's brain state time series, we chose the widely used Lempel-Ziv algorithm<sup>94,95</sup>; this algorithm assesses the complexity of a binary sequence in terms of the number of unique patterns it contains. A sequence that contains a larger number of unique patterns is

more diverse, making it less predictable and therefore more entropic. The normalized Lempel-Ziv complexity (also known as Lempel-Ziv compressibility) is then the number of patterns found in the sequence, divided by the total length of the sequence. In order to apply this algorithm to our brain state time series, we first had to convert them to binary sequences that returned 0 or 1 for each time point. To do so, we considered the natural grouping of our 4 brain states into two meta-states (Meta-State 1 and Meta-State 2). We consider this simplification to be justified by the fact that direct transitions between sub-states (e.g. MS-1a to MS-1b) were extremely rare (SI Figure 16a), thereby allowing us to reduce the 4-state time series to a 2-state time series while losing very little information regarding transitions.

### ***Statistical comparisons***

The 5-HT<sub>2a</sub> - weighted inputs from the true receptor distribution were compared to the randomly shuffled distributions via a permutation test where the true receptor distribution was spin-permuted and the energy matrix re-calculated 10,000 times<sup>50</sup>. P-values were calculated as the fraction of times that the randomized distribution resulted in a lower energy than the true distribution. All other metric comparisons were achieved using a paired t-test of group means and were corrected for multiple comparisons with Benjamini-Hochberg where correction is indicated.

### ***Code and data availability***

This project used open-source code cited in the main text, as well as code published by Cornblath et al<sup>30</sup>. A repository for reproducing the analysis is available here:

[https://github.com/singlesp/energy\\_landscape](https://github.com/singlesp/energy_landscape). The data are freely available at <https://openneuro.org/datasets/ds003059/versions/1.0.0>.

### ***Ethics and approval***

The original studies were approved by the National Research Ethics Service committee London-West London and conducted in accordance with the revised declaration of Helsinki (2000), the International Committee on Harmonization Good Clinical Practice guidelines, and National Health Service Research Governance Framework. Imperial College London sponsored the research, which was conducted under a Home Office license for research with schedule 1 drugs.

### ***Citation and gender diversity statement***

Recent work in neuroscience and other fields has identified a bias in citation practices such that papers from women and other minorities are under-cited relative to the number of such papers in the field<sup>96–100</sup>. Here, we sought to proactively consider choosing references that reflect the diversity of the field in thought, form of contribution, gender, and other factors. We used classification of gender based on the first names of the first and last authors<sup>97,101</sup>, with possible combinations including male/male, male/female, female/male, and female/female. Excluding self-citations to the first and last authors of our current paper, the references contain 58.82% male/male, 15.29% male/female, 18.82% female/male, and 7.06% female/female. We look forward to future work that could help us to better understand how to support equitable practices in science.

### **Acknowledgements:**

SPS is supported by the National Science Foundation Graduate Research Fellowship (Grant No. DGE-1650441). AIL is supported by the Gates Cambridge Trust. RLC-H was supported by the Alex Mosley Charitable Trust and supporters of the Centre for Psychedelic Research during the period of data collection, analysis and write-up and now holds the Ralph Metzner Distinguished Professorship at UCSF. The original study received support from a Crowd Funding Campaign and the Beckley Foundation, as part of the Beckley-Imperial Research Programme. JC is supported by the Spanish Ministry of Science and Innovation under the fellowship BES-2017-080364. DJN is the Edmond J. Safra Prof of Neuropsychopharmacology at Imperial College London. GD is supported by the Spanish Research Project (ref. PID2019-105772GB-I00 AEI FEDER EU), funded by the Spanish Ministry of Science, Innovation and Universities (MCIU), State Research Agency (AEI) and European Regional Development Funds (FEDER); HBP SGA3 Human Brain Project Specific Grant Agreement 3 (Grant Agreement No. 945539), funded by the EU H2020 FET Flagship program and SGR Research Support Group support (ref. 2017 SGR 1545), funded by the Catalan Agency for Management of University and Research Grants (AGAUR). MLK is supported by the Center for Music in the Brain, funded by the Danish National Research Foundation (DNRF117), and Centre for Eudaimonia and Human Flourishing funded by the Pettit and Carlsberg Foundations. EAS is supported by the Stephen Erskine Fellowship from Queens' College, Cambridge. AK is supported by the National Institutes of Health (RF1MH123232, R01NS102646 and R21NS104634).

## References:

1. Shulgin AT, Shulgin A. *Tihkal: The Continuation*. Transform Press; 1997.
2. Doss MK, Madden MB, Gaddis A, et al. Models of psychedelic drug action: modulation of cortical-subcortical circuits. *Brain*. Published online December 13, 2021:awab406. doi:10.1093/brain/awab406
3. Carhart-Harris RL, Friston KJ. REBUS and the Anarchic Brain: Toward a Unified Model of the Brain Action of Psychedelics. Barker EL, ed. *Pharmacol Rev*. 2019;71(3):316-344. doi:10.1124/pr.118.017160
4. Carhart-Harris RL, Leech R, Hellyer PJ, et al. The entropic brain: a theory of conscious states informed by neuroimaging research with psychedelic drugs. *Front Hum Neurosci*. 2014;8. doi:10.3389/fnhum.2014.00020
5. Carhart-Harris RL. The entropic brain - revisited. *Neuropharmacology*. 2018;142:167-178. doi:10.1016/j.neuropharm.2018.03.010
6. Luppi AI, Carhart-Harris RL, Roseman L, Pappas I, Menon DK, Stamatakis EA. LSD alters dynamic integration and segregation in the human brain. *NeuroImage*. 2021;227:117653. doi:10.1016/j.neuroimage.2020.117653
7. Deco G, Cruzat J, Cabral J, et al. Whole-Brain Multimodal Neuroimaging Model Using Serotonin Receptor Maps Explains Non-linear Functional Effects of LSD. *Curr Biol*. 2018;28(19):3065-3074.e6. doi:10.1016/j.cub.2018.07.083
8. Kringelbach ML, Cruzat J, Cabral J, et al. Dynamic coupling of whole-brain neuronal and neurotransmitter systems. *Proc Natl Acad Sci*. 2020;117(17):9566-9576. doi:10.1073/pnas.1921475117
9. Herzog R, Mediano PAM, Rosas FE, et al. A mechanistic model of the neural entropy increase elicited by psychedelic drugs. *Sci Rep*. 2020;10(1):17725. doi:10.1038/s41598-020-74060-6
10. Lurie D, Kessler D, Bassett D, et al. On the nature of time-varying functional connectivity in resting fMRI. Published online December 24, 2018. doi:10.31234/osf.io/xtzre

11. Preti MG, Bolton TA, Van De Ville D. The dynamic functional connectome: State-of-the-art and perspectives. *NeuroImage*. 2017;160:41-54. doi:10.1016/j.neuroimage.2016.12.061
12. Vohryzek J, Deco G, Cessac B, Kringelbach ML, Cabral J. Ghost Attractors in Spontaneous Brain Activity: Recurrent Excursions Into Functionally-Relevant BOLD Phase-Locking States. *Front Syst Neurosci*. 2020;14. doi:10.3389/fnsys.2020.00020
13. Cabral J, Kringelbach ML, Deco G. Exploring the network dynamics underlying brain activity during rest. *Prog Neurobiol*. 2014;114:102-131. doi:10.1016/j.pneurobio.2013.12.005
14. Cabral J, Kringelbach ML, Deco G. Functional connectivity dynamically evolves on multiple time-scales over a static structural connectome: Models and mechanisms. *NeuroImage*. 2017;160:84-96. doi:10.1016/j.neuroimage.2017.03.045
15. Deco G, Kringelbach ML. Great Expectations: Using Whole-Brain Computational Connectomics for Understanding Neuropsychiatric Disorders. *Neuron*. 2014;84(5):892-905. doi:10.1016/j.neuron.2014.08.034
16. Kringelbach ML, Deco G. Brain States and Transitions: Insights from Computational Neuroscience. *Cell Rep*. 2020;32(10):108128. doi:10.1016/j.celrep.2020.108128
17. Hutchison RM, Womelsdorf T, Allen EA, et al. Dynamic functional connectivity: promise, issues, and interpretations. *NeuroImage*. 2013;80:360-378. doi:10.1016/j.neuroimage.2013.05.079
18. Shine JM, Bissett PG, Bell PT, et al. The Dynamics of Functional Brain Networks: Integrated Network States during Cognitive Task Performance. *Neuron*. 2016;92(2):544-554. doi:10.1016/j.neuron.2016.09.018
19. Esfahlani FZ, Jo Y, Faskowitz J, et al. High-amplitude co-fluctuations in cortical activity drive functional connectivity. *Proc Natl Acad Sci*. 2020;117(45):28393-28401. doi:10.1073/pnas.2005531117
20. Cabral J, Vidaurre D, Marques P, et al. Cognitive performance in healthy older adults relates to spontaneous switching between states of functional connectivity during rest. *Sci Rep*. 2017;7(1):5135. doi:10.1038/s41598-017-05425-7
21. Alonso Martínez S, Deco G, Ter Horst GJ, Cabral J. The Dynamics of Functional Brain Networks Associated With Depressive Symptoms in a Nonclinical Sample. *Front Neural Circuits*. 2020;14. doi:10.3389/fncir.2020.570583
22. Demertzi A, Tagliazucchi E, Dehaene S, et al. Human consciousness is supported by dynamic complex patterns of brain signal coordination. *Sci Adv*. 2019;5(2):eaat7603. doi:10.1126/sciadv.aat7603
23. Luppi AI, Craig MM, Pappas I, et al. Consciousness-specific dynamic interactions of brain integration and functional diversity. *Nat Commun*. 2019;10(1):4616. doi:10.1038/s41467-019-12658-9
24. Luppi AI, Mediano PAM, Rosas FE, et al. Whole-brain modelling identifies distinct but convergent paths to unconsciousness in anaesthesia and disorders of consciousness. *Commun Biol*. 2022;5(1):1-15. doi:10.1038/s42003-022-03330-y
25. Barttfeld P, Uhrig L, Sitt JD, Sigman M, Jarraya B, Dehaene S. Signature of consciousness in the dynamics of resting-state brain activity. *Proc Natl Acad Sci*. 2015;112(3):887-892. doi:10.1073/pnas.1418031112
26. Huang Z, Zhang J, Wu J, Mashour GA, Hudetz AG. Temporal circuit of macroscale dynamic brain activity supports human consciousness. *Sci Adv*. 2020;6(11):eaaz0087. doi:10.1126/sciadv.aaz0087
27. Luppi AI, Golkowski D, Ranft A, et al. Brain network integration dynamics are associated with loss and recovery of consciousness induced by sevoflurane. *Hum Brain Mapp*. n/a(n/a). doi:<https://doi.org/10.1002/hbm.25405>
28. Hutchison RM, Hutchison M, Manning KY, Menon RS, Everling S. Isoflurane induces dose-dependent alterations in the cortical connectivity profiles and dynamic properties of the brain's functional architecture. *Hum Brain Mapp*. 2014;35(12):5754-5775. doi:<https://doi.org/10.1002/hbm.22583>

29. Lord LD, Expert P, Atasoy S, et al. Dynamical exploration of the repertoire of brain networks at rest is modulated by psilocybin. *NeuroImage*. 2019;199:127-142. doi:10.1016/j.neuroimage.2019.05.060
30. Cornblath EJ, Ashourvan A, Kim JZ, et al. Temporal sequences of brain activity at rest are constrained by white matter structure and modulated by cognitive demands. *Commun Biol*. 2020;3(1):261. doi:10.1038/s42003-020-0961-x
31. Braun U, Harnett A, Pergola G, et al. Brain network dynamics during working memory are modulated by dopamine and diminished in schizophrenia. *Nat Commun*. 2021;12(1):3478. doi:10.1038/s41467-021-23694-9
32. Parkes L, Moore TM, Calkins ME, et al. Network Controllability in Transmodal Cortex Predicts Positive Psychosis Spectrum Symptoms. *Biol Psychiatry*. Published online March 21, 2021. doi:10.1016/j.biopsych.2021.03.016
33. Yeh FC, Panesar S, Fernandes D, et al. Population-averaged atlas of the macroscale human structural connectome and its network topology. *NeuroImage*. 2018;178:57-68. doi:10.1016/j.neuroimage.2018.05.027
34. Beliveau V, Ganz M, Feng L, et al. A High-Resolution *In Vivo* Atlas of the Human Brain's Serotonin System. *J Neurosci*. 2017;37(1):120-128. doi:10.1523/JNEUROSCI.2830-16.2016
35. Carhart-Harris RL, Muthukumaraswamy S, Roseman L, et al. Neural correlates of the LSD experience revealed by multimodal neuroimaging. *Proc Natl Acad Sci*. 2016;113(17):4853-4858. doi:10.1073/pnas.1518377113
36. Carhart-Harris RL, Erritzoe D, Williams T, et al. Neural correlates of the psychedelic state as determined by fMRI studies with psilocybin. *Proc Natl Acad Sci*. 2012;109(6):2138-2143. doi:10.1073/pnas.1119598109
37. Allen EA, Damaraju E, Plis SM, Erhardt EB, Eichele T, Calhoun VD. Tracking Whole-Brain Connectivity Dynamics in the Resting State. *Cereb Cortex*. 2014;24(3):663-676. doi:10.1093/cercor/bhs352
38. Gutierrez-Barragan D, Basson MA, Panzeri S, Gozzi A. Infralow State Fluctuations Govern Spontaneous fMRI Network Dynamics. *Curr Biol*. 2019;29(14):2295-2306.e5. doi:10.1016/j.cub.2019.06.017
39. Vidaurre D, Smith SM, Woolrich MW. Brain network dynamics are hierarchically organized in time. *Proc Natl Acad Sci*. 2017;114(48):12827-12832. doi:10.1073/pnas.1705120114
40. Chen RH, Ito T, Kulkarni KR, Cole MW. The Human Brain Traverses a Common Activation-Pattern State Space Across Task and Rest. *Brain Connect*. 2018;8(7):429-443. doi:10.1089/brain.2018.0586
41. Thomas Yeo BT, Krienen FM, Sepulcre J, et al. The organization of the human cerebral cortex estimated by intrinsic functional connectivity. *J Neurophysiol*. 2011;106(3):1125-1165. doi:10.1152/jn.00338.2011
42. Gu S, Pasqualetti F, Cieslak M, et al. Controllability of structural brain networks. *Nat Commun*. 2015;6(1):8414. doi:10.1038/ncomms9414
43. Betzel RF, Gu S, Medaglia JD, Pasqualetti F, Bassett DS. Optimally controlling the human connectome: the role of network topology. *Sci Rep*. 2016;6(1):30770. doi:10.1038/srep30770
44. Karrer TM, Kim JZ, Stiso J, et al. A practical guide to methodological considerations in the controllability of structural brain networks. *J Neural Eng*. 2020;17(2):026031. doi:10.1088/1741-2552/ab6e8b
45. Kraehenmann R, Pokorny D, Aicher H, et al. LSD Increases Primary Process Thinking via Serotonin 2A Receptor Activation. *Front Pharmacol*. 2017;8. doi:10.3389/fphar.2017.00814
46. Kraehenmann R, Pokorny D, Vollenweider L, et al. Dreamlike effects of LSD on waking imagery in humans depend on serotonin 2A receptor activation. *Psychopharmacology (Berl)*. 2017;234(13):2031-2046. doi:10.1007/s00213-017-4610-0
47. Preller KH, Schilbach L, Pokorny T, Flemming J, Seifritz E, Vollenweider FX. Role of the 5-HT2A Receptor in Self- and Other-Initiated Social Interaction in Lysergic Acid Diethylamide-Induced

- States: A Pharmacological fMRI Study. *J Neurosci*. 2018;38(14):3603-3611. doi:10.1523/JNEUROSCI.1939-17.2018
48. Duerler P, Schilbach L, Stämpfli P, Vollenweider FX, Preller KH. LSD-induced increases in social adaptation to opinions similar to one's own are associated with stimulation of serotonin receptors. *Sci Rep*. 2020;10(1):12181. doi:10.1038/s41598-020-68899-y
  49. Preller KH, Burt JB, Ji JL, et al. Changes in global and thalamic brain connectivity in LSD-induced altered states of consciousness are attributable to the 5-HT<sub>2A</sub> receptor. Hunt LT, Behrens TE, eds. *eLife*. 2018;7:e35082. doi:10.7554/eLife.35082
  50. Váša F, Seidlitz J, Romero-Garcia R, et al. Adolescent Tuning of Association Cortex in Human Structural Brain Networks. *Cereb Cortex*. 2018;28(1):281-294. doi:10.1093/cercor/bhx249
  51. Markello RD, Misic B. Comparing spatial null models for brain maps. *NeuroImage*. 2021;236:118052. doi:10.1016/j.neuroimage.2021.118052
  52. Cai X, Kallarackal AJ, Kvarita MD, et al. Local potentiation of excitatory synapses by serotonin and its alteration in rodent models of depression. *Nat Neurosci*. 2013;16(4):464-472. doi:10.1038/nn.3355
  53. Hesselgrave N, Troppoli TA, Wulff AB, Cole AB, Thompson SM. Harnessing psilocybin: antidepressant-like behavioral and synaptic actions of psilocybin are independent of 5-HT<sub>2R</sub> activation in mice. *Proc Natl Acad Sci*. 2021;118(17). doi:10.1073/pnas.2022489118
  54. Shao LX, Liao C, Gregg I, et al. Psilocybin induces rapid and persistent growth of dendritic spines in frontal cortex in vivo. *Neuron*. 2021;109(16):2535-2544.e4. doi:10.1016/j.neuron.2021.06.008
  55. Schartner MM, Carhart-Harris RL, Barrett AB, Seth AK, Muthukumaraswamy SD. Increased spontaneous MEG signal diversity for psychoactive doses of ketamine, LSD and psilocybin. *Sci Rep*. 2017;7(1):46421. doi:10.1038/srep46421
  56. Viol A, Palhano-Fontes F, Onias H, de Araujo DB, Viswanathan GM. Shannon entropy of brain functional complex networks under the influence of the psychedelic Ayahuasca. *Sci Rep*. 2017;7(1):7388. doi:10.1038/s41598-017-06854-0
  57. Timmermann C, Roseman L, Schartner M, et al. Neural correlates of the DMT experience assessed with multivariate EEG. *Sci Rep*. 2019;9(1):16324. doi:10.1038/s41598-019-51974-4
  58. Lebedev AV, Kaelen M, Lövdén M, et al. LSD-induced entropic brain activity predicts subsequent personality change: LSD-Induced Entropic Brain Activity. *Hum Brain Mapp*. 2016;37(9):3203-3213. doi:10.1002/hbm.23234
  59. Varley TF, Carhart-Harris R, Roseman L, Menon DK, Stamatakis EA. Serotonergic psychedelics LSD & psilocybin increase the fractal dimension of cortical brain activity in spatial and temporal domains. *NeuroImage*. 2020;220:117049. doi:10.1016/j.neuroimage.2020.117049
  60. Girn M, Roseman L, Bernhardt B, Smallwood J, Carhart-Harris R, Spreng RN. Serotonergic psychedelic drugs LSD and psilocybin reduce the hierarchical differentiation of unimodal and transmodal cortex. *NeuroImage*. Published online April 25, 2022:119220. doi:10.1016/j.neuroimage.2022.119220
  61. Raichle ME, MacLeod AM, Snyder AZ, Powers WJ, Gusnard DA, Shulman GL. A default mode of brain function. *Proc Natl Acad Sci*. 2001;98(2):676-682. doi:10.1073/pnas.98.2.676
  62. Raichle ME. The Brain's Default Mode Network. *Annu Rev Neurosci*. 2015;38(1):433-447. doi:10.1146/annurev-neuro-071013-014030
  63. Buckner RL, DiNicola LM. The brain's default network: updated anatomy, physiology and evolving insights. *Nat Rev Neurosci*. 2019;20(10):593-608. doi:10.1038/s41583-019-0212-7
  64. Yeshurun Y, Nguyen M, Hasson U. The default mode network: where the idiosyncratic self meets the shared social world. *Nat Rev Neurosci*. 2021;22(3):181-192. doi:10.1038/s41583-020-00420-w
  65. Northoff G, Wainio-Theberge S, Evers K. Is temporo-spatial dynamics the "common currency" of brain and mind? In Quest of "Spatiotemporal Neuroscience." *Phys Life Rev*. 2020;33:34-54. doi:10.1016/j.plev.2019.05.002
  66. Friston K. The free-energy principle: a unified brain theory? *Nat Rev Neurosci*. 2010;11(2):127-138. doi:10.1038/nrn2787



67. Atasoy S, Roseman L, Kaelen M, Kringelbach ML, Deco G, Carhart-Harris RL. Connectome-harmonic decomposition of human brain activity reveals dynamical repertoire re-organization under LSD. *Sci Rep*. 2017;7(1):17661. doi:10.1038/s41598-017-17546-0
68. Luppi AI, Vohryzek J, Kringelbach ML, et al. Connectome Harmonic Decomposition of Human Brain Dynamics Reveals a Landscape of Consciousness. *bioRxiv*. Published online August 10, 2020:2020.08.10.244459. doi:10.1101/2020.08.10.244459
69. Mediano PAM, Rosas FE, Timmermann C, et al. Effects of external stimulation on psychedelic state neurodynamics. *bioRxiv*. Published online November 2, 2020:2020.11.01.356071. doi:10.1101/2020.11.01.356071
70. Atasoy S, Vohryzek J, Deco G, Carhart-Harris RL, Kringelbach ML. Chapter 4 - Common neural signatures of psychedelics: Frequency-specific energy changes and repertoire expansion revealed using connectome-harmonic decomposition. In: Calvey T, ed. *Progress in Brain Research*. Vol 242. Psychedelic Neuroscience. Elsevier; 2018:97-120. doi:10.1016/bs.pbr.2018.08.009
71. Tagliazucchi E, Carhart-Harris R, Leech R, Nutt D, Chialvo DR. Enhanced repertoire of brain dynamical states during the psychedelic experience. *Hum Brain Mapp*. 2014;35(11):5442-5456. doi:10.1002/hbm.22562
72. Mateo C, Knutsen PM, Tsai PS, Shih AY, Kleinfeld D. Entrainment of Arteriole Vasomotor Fluctuations by Neural Activity Is a Basis of Blood-Oxygenation-Level-Dependent "Resting-State" Connectivity. *Neuron*. 2017;96(4):936-948.e3. doi:10.1016/j.neuron.2017.10.012
73. Pan WJ, Thompson GJ, Magnuson ME, Jaeger D, Keilholz S. Infralow LFP correlates to resting-state fMRI BOLD signals. *NeuroImage*. 2013;74:288-297. doi:10.1016/j.neuroimage.2013.02.035
74. Liu X, Chang C, Duyn JH. Decomposition of spontaneous brain activity into distinct fMRI co-activation patterns. *Front Syst Neurosci*. 2013;7:101. doi:10.3389/fnsys.2013.00101
75. Chen JE, Chang C, Greicius MD, Glover GH. Introducing co-activation pattern metrics to quantify spontaneous brain network dynamics. *NeuroImage*. 2015;111:476-488. doi:10.1016/j.neuroimage.2015.01.057
76. Zhang X, Pan WJ, Keilholz SD. The relationship between BOLD and neural activity arises from temporally sparse events. *NeuroImage*. 2020;207:116390. doi:10.1016/j.neuroimage.2019.116390
77. Dittrich A. The Standardized Psychometric Assessment of Altered States of Consciousness (ASCs) in Humans. *Pharmacopsychiatry*. 1998;31(S 2):80-84.
78. Studerus E, Gamma A, Vollenweider FX. Psychometric Evaluation of the Altered States of Consciousness Rating Scale (OAV). *PLOS ONE*. 2010;5(8):e12412. doi:10.1371/journal.pone.0012412
79. Barrett FS, Carbonaro TM, Hurwitz E, Johnson MW, Griffiths RR. Double-blind comparison of the two hallucinogens psilocybin and dextromethorphan: effects on cognition. *Psychopharmacology (Berl)*. 2018;235(10):2915-2927. doi:10.1007/s00213-018-4981-x
80. Carhart-Harris RL, Leech R, Williams TM, et al. Implications for psychedelic-assisted psychotherapy: functional magnetic resonance imaging study with psilocybin. *Br J Psychiatry*. 2012;200(3):238-244. doi:10.1192/bjp.bp.111.103309
81. Nozari E, Stiso J, Caciagli L, et al. Is the brain macroscopically linear? A system identification of resting state dynamics. *ArXiv201212351 Cs Eess Math Q-Bio*. Published online December 22, 2020. Accessed April 28, 2021. <http://arxiv.org/abs/2012.12351>
82. Schulz MA, Yeo BTT, Vogelstein JT, et al. Different scaling of linear models and deep learning in UKBiobank brain images versus machine-learning datasets. *Nat Commun*. 2020;11(1):4238. doi:10.1038/s41467-020-18037-z
83. Cammoun L, Gigandet X, Meskaldji D, et al. Mapping the human connectome at multiple scales with diffusion spectrum MRI. *J Neurosci Methods*. 2012;203(2):386-397. doi:10.1016/j.jneumeth.2011.09.031
84. Van Essen DC, Smith SM, Barch DM, Behrens TEJ, Yacoub E, Ugurbil K. The WU-Minn Human Connectome Project: An overview. *NeuroImage*. 2013;80:62-79.

doi:10.1016/j.neuroimage.2013.05.041

85. Luppí AI, Stamatakis EA. Combining network topology and information theory to construct representative brain networks. *Netw Neurosci*. 2021;5(1):96-124. doi:10.1162/netn\_a\_00170
86. Yeh FC, Wedeen VJ, Tseng WYI. Estimation of fiber orientation and spin density distribution by diffusion deconvolution. *NeuroImage*. 2011;55(3):1054-1062. doi:10.1016/j.neuroimage.2010.11.087
87. Yeh FC, Verstynen TD, Wang Y, Fernández-Miranda JC, Tseng WYI. Deterministic Diffusion Fiber Tracking Improved by Quantitative Anisotropy. *PLOS ONE*. 2013;8(11):e80713. doi:10.1371/journal.pone.0080713
88. Schaefer A, Kong R, Gordon EM, et al. Local-Global Parcellation of the Human Cerebral Cortex from Intrinsic Functional Connectivity MRI. *Cereb Cortex*. 2018;28(9):3095-3114. doi:10.1093/cercor/bhx179
89. Tian Y, Margulies DS, Breakspear M, Zalesky A. Topographic organization of the human subcortex unveiled with functional connectivity gradients. *Nat Neurosci*. 2020;23(11):1421-1432. doi:10.1038/s41593-020-00711-6
90. Olesen OV, Sibomana M, Keller SH, et al. Spatial resolution of the HRRT PET scanner using 3D-OSEM PSF reconstruction. In: *2009 IEEE Nuclear Science Symposium Conference Record (NSS/MIC)*. ; 2009:3789-3790. doi:10.1109/NSSMIC.2009.5401892
91. Knudsen GM, Jensen PS, Erritzoe D, et al. The Center for Integrated Molecular Brain Imaging (Cimbi) database. *NeuroImage*. 2016;124:1213-1219. doi:10.1016/j.neuroimage.2015.04.025
92. Nguyen XV. The Adjusted Mutual Information. Accessed April 16, 2021. <https://www.mathworks.com/matlabcentral/fileexchange/33144-the-adjusted-mutual-information>
93. Tang E, Giusti C, Baum GL, et al. Developmental increases in white matter network controllability support a growing diversity of brain dynamics. *Nat Commun*. 2017;8(1):1252. doi:10.1038/s41467-017-01254-4
94. Lempel A, Ziv J. On the Complexity of Finite Sequences. *IEEE Trans Inf Theory*. 1976;22(1):75-81. doi:10.1109/TIT.1976.1055501
95. Thai Q. calc\_lz\_complexity. Accessed May 5, 2021. [https://www.mathworks.com/matlabcentral/fileexchange/38211-calc\\_lz\\_complexity](https://www.mathworks.com/matlabcentral/fileexchange/38211-calc_lz_complexity)
96. Maliniak D, Powers R, Walter BF. The Gender Citation Gap in International Relations. *Int Organ*. 2013;67(4):889-922. doi:10.1017/S0020818313000209
97. Dworkin JD, Linn KA, Teich EG, Zurn P, Shinohara RT, Bassett DS. The extent and drivers of gender imbalance in neuroscience reference lists. *Nat Neurosci*. 2020;23(8):918-926. doi:10.1038/s41593-020-0658-y
98. Dion ML, Sumner JL, Mitchell SM. Gendered Citation Patterns across Political Science and Social Science Methodology Fields. *Polit Anal*. 2018;26(3):312-327. doi:10.1017/pan.2018.12
99. Chakravartty P, Kuo R, Grubbs V, McIlwain C. #CommunicationSoWhite. *J Commun*. 2018;68(2):254-266. doi:10.1093/joc/jqy003
100. Caplar N, Tacchella S, Birrer S. Quantitative evaluation of gender bias in astronomical publications from citation counts. *Nat Astron*. 2017;1(6):1-5. doi:10.1038/s41550-017-0141
101. Dale Zhou, Jennifer Stiso, Eli Cornblath, et al. *Dalejn/CleanBib: V1.1.1*. Zenodo; 2020. doi:10.5281/zenodo.4104748
